# Supplementary material
Source: PubMed Central journal article supplement (PMC8286346)
Supplement: NIHMS1710170-supplement-6.pdf [file NIHMS1710170-supplement-6.pdf]

| Pathway                      | Oncogene/Tumor Suppressor | Type of Alteration | WT (n=12) | KrasLA1 (n=8) | p53+/- (n=4) | NIR p53 -/- (n=7) |
|------------------------------|---------------------------|--------------------|-----------|---------------|--------------|-------------------|
| <b>Notch Signaling</b>       |                           |                    |           |               |              |                   |
| Notch1                       | Oncogene                  | Mutation           | 75.0%     | 62.5%         | 25.0%        | 28.6%             |
| Ikzf1                        | Tumor Suppressor          | CNVs               | 75.0%     | 62.5%         | 50.0%        | 28.6%             |
| Ikzf1                        | Tumor Suppressor          | Mutation           | 50.0%     | 37.5%         | 25.0%        | 0.0%              |
| <b>PI3K/AKT/mTOR pathway</b> |                           |                    |           |               |              |                   |
| Akt1                         | Oncogene                  | Mutation           | 8.3%      | 12.5%         | 0.0%         | 0.0%              |
| Pten                         | Tumor Suppressor          | CNVs               | 25.0%     | 0.0%          | 25.0%        | 42.9%             |
| Pten                         | Tumor Suppressor          | Mutation           | 16.7%     | 0.0%          | 50.0%        | 14.3%             |
| Mtor                         | Oncogene                  | CNVs               | 8.3%      | 0.0%          | 75.0%        | 28.6%             |
| Mtor                         | Oncogene                  | Mutation           | 0.0%      | 0.0%          | 0.0%         | 14.3%             |
| <b>MEK/ERK Pathway</b>       |                           |                    |           |               |              |                   |
| Kras                         | Oncogene                  | Mutation           | 8.3%      | 100.0%        | 0.0%         | 0.0%              |
| Flt3                         | Oncogene                  | CNVs               | 0.0%      | 0.0%          | 25.0%        | 0.0%              |
| Ptpn11                       | Oncogene                  | Mutation           | 8.3%      | 0.0%          | 0.0%         | 0.0%              |
| Cxcr4                        | Oncogene                  | Mutation           | 8.3%      | 0.0%          | 0.0%         | 0.0%              |
| Ackr3                        | Oncogene                  | Mutation           | 0.0%      | 12.5%         | 0.0%         | 0.0%              |
| <b>Epigenetic Modifiers</b>  |                           |                    |           |               |              |                   |
| Chd4                         | Oncogene                  | Mutation           | 8.3%      | 0.0%          | 0.0%         | 0.0%              |
| Dnmt3a                       | Tumor Suppressor          | CNVs               | 0.0%      | 0.0%          | 25.0%        | 42.9%             |
| Esr1                         | Oncogene                  | Mutation           | 0.0%      | 12.5%         | 0.0%         | 0.0%              |
| Bcl11b                       | Tumor Suppressor          | CNVs               | 50.0%     | 50.0%         | 75.0%        | 28.6%             |
| Bcl11b                       | Tumor Suppressor          | Mutation           | 8.3%      | 0.0%          | 0.0%         | 0.0%              |
| Dicer1                       | Tumor Suppressor          | CNVs               | 66.7%     | 75.0%         | 50.0%        | 71.4%             |
| Ezh2                         | Oncogene                  | Mutation           | 8.3%      | 0.0%          | 0.0%         | 0.0%              |
| Kmt2c                        | Tumor Suppressor          | Mutation           | 0.0%      | 12.5%         | 0.0%         | 0.0%              |
| <b>Hippo Pathway</b>         |                           |                    |           |               |              |                   |
| Nf2                          | Tumor Suppressor          | CNVs               | 50.0%     | 62.5%         | 50.0%        | 28.6%             |
| Fat1                         | Tumor Suppressor          | Mutation           | 0.0%      | 0.0%          | 0.0%         | 14.3%             |
| <b>Wnt Signaling</b>         |                           |                    |           |               |              |                   |
| Lrig3                        | Tumor Suppressor          | CNVs               | 25.0%     | 0.0%          | 25.0%        | 57.1%             |
| Lrig3                        | Tumor Suppressor          | Mutation           | 8.3%      | 0.0%          | 0.0%         | 0.0%              |
| Cdh11                        | Tumor Suppressor          | CNVs               | 50.0%     | 0.0%          | 0.0%         | 100.0%            |
| Rspo3                        | Oncogene                  | CNVs               | 25.0%     | 12.5%         | 50.0%        | 14.3%             |
| Lrp1b                        | Tumor Suppressor          | Mutation           | 0.0%      | 12.5%         | 0.0%         | 0.0%              |
| <b>DNA Damage Response</b>   |                           |                    |           |               |              |                   |
| p53                          | Tumor Suppressor          | CNVs               | 8.3%      | 12.5%         | 100.0%       | 100.0%            |
| p53                          | Tumor Suppressor          | Mutation           | 16.7%     | 0.0%          | 0.0%         | 0.0%              |
| Fancg                        | Tumor Suppressor          | CNVs               | 58.3%     | 37.5%         | 100.0%       | 57.1%             |
| Rpl5                         | Tumor Suppressor          | Mutation           | 8.3%      | 0.0%          | 0.0%         | 0.0%              |
| Xpa                          | Tumor Suppressor          | Mutation           | 0.0%      | 0.0%          | 25.0%        | 0.0%              |
| <b>Others</b>                |                           |                    |           |               |              |                   |
| Ncoa4                        | Tumor Suppressor          | Mutation           | 0.0%      | 0.0%          | 0.0%         | 14.3%             |
| Stil                         | Oncogene                  | Mutation           | 8.3%      | 0.0%          | 0.0%         | 0.0%              |
| Pold1                        | Tumor Suppressor          | CNVs               | 33.3%     | 62.5%         | 75.0%        | 14.3%             |
| Ptprb                        | Tumor Suppressor          | Mutation           | 8.3%      | 0.0%          | 0.0%         | 0.0%              |
| Ptprc                        | Tumor Suppressor          | Mutation           | 8.3%      | 0.0%          | 0.0%         | 0.0%              |
| Tdpoz5                       | Tumor Suppressor          | CNVs               | 16.7%     | 0.0%          | 0.0%         | 71.4%             |
| Tdpoz3                       | Tumor Suppressor          | Mutation           | 0.0%      | 0.0%          | 0.0%         | 14.3%             |

**Table S5.** Summary of mutations and copy number variations in COSMIC genes among different cohorts of thymic lymphomas. Note: the frequency of Kras mutation and p53 mutation in Kras<sup>LA1</sup> and p53 deficient mice, respectively, is defined as 100%.
